# Supplementary material for: Preparation of a reusable and pore size controllable porous polymer monolith and its catalysis of biodiesel synthesis
Source: Royal Society of Chemistry journal article supplement (doi:10.1039/d2ra01610a), 2022-01-01
Supplement: d2ra01610a1.pdf [file d2ra01610a1.pdf]

**Preparation of reusable and pore size controllable porous polymer  
monolith and its catalysis in biodiesel synthesis**

Weiying Chen, Zhaoji Wu, Zhengge Wang, Changjiu Chen and Zhigang Zhang\*

*College of Chemical Engineering, Hebei Normal University of Science and Technology,  
Qinhuangdao, China 066600*

\*Corresponding author: Zhigang Zhang, e-mail: zgzhang333@163.com, Hebei Normal  
University of Science and Technology, Qinhuangdao, China 066600.

**Table S1.** Arrangement and results of the orthogonal experiment design for the optimization of biodiesel preparation from waste fatty acids

| Trial number | MeOH to oil ratio A (w/w) | Catalyst concentration B (respect to oil) (wt.%) | Reaction temperature C (°C) | Reaction time D (h) | Esterification rate (%) |
|--------------|---------------------------|--------------------------------------------------|-----------------------------|---------------------|-------------------------|
| 1            | 0.5                       | 5                                                | 50                          | 2                   | 21.3                    |
| 2            | 0.5                       | 10                                               | 60                          | 4                   | 64.2                    |
| 3            | 0.5                       | 15                                               | 70                          | 6                   | 82.5                    |
| 4            | 0.5                       | 20                                               | 80                          | 8                   | 89.9                    |
| 5            | 1                         | 5                                                | 60                          | 6                   | 67.6                    |
| 6            | 1                         | 10                                               | 50                          | 8                   | 80.0                    |
| 7            | 1                         | 15                                               | 80                          | 2                   | 78.3                    |
| 8            | 1                         | 20                                               | 70                          | 4                   | 91.1                    |
| 9            | 1.25                      | 5                                                | 70                          | 8                   | 82.9                    |
| 10           | 1.25                      | 10                                               | 80                          | 6                   | 92.4                    |
| 11           | 1.25                      | 15                                               | 50                          | 4                   | 65.0                    |
| 12           | 1.25                      | 20                                               | 60                          | 2                   | 63.9                    |
| 13           | 1.5                       | 5                                                | 80                          | 4                   | 71.6                    |
| 14           | 1.5                       | 10                                               | 70                          | 2                   | 60.4                    |
| 15           | 1.5                       | 15                                               | 60                          | 8                   | 92.3                    |
| 16           | 1.5                       | 20                                               | 50                          | 6                   | 79.1                    |

**Table S2.** Range analysis of the orthogonal experiment

| Level          | Factors             |                          |                        |                 |
|----------------|---------------------|--------------------------|------------------------|-----------------|
|                | MeOH to oil ratio A | Catalyst concentration B | Reaction Temperature C | Reaction time D |
| K <sub>1</sub> | 64.4                | 60.9                     | 61.4                   | 56.0            |
| K <sub>2</sub> | 79.2                | 74.2                     | 72.0                   | 73.0            |
| K <sub>3</sub> | 76.0                | 79.5                     | 79.2                   | 80.4            |
| K <sub>4</sub> | 75.9                | 81.0                     | 83.0                   | 86.3            |
| R              | 14.8                | 20.1                     | 21.7                   | 30.3            |

**Table S3.** Univariate analysis of the orthogonal experiment

| Source                 | Type III sum of squares | Freedom degrees | Mean square | F        | Sig. |
|------------------------|-------------------------|-----------------|-------------|----------|------|
| Corrected model        | 4676.383 <sup>a</sup>   | 12              | 389.699     | 18.818   | .017 |
| Intercept              | 87394.141               | 1               | 87394.141   | 4220.113 | .000 |
| MeOH to oil ratio      | 503.512                 | 3               | 167.837     | 8.105    | .060 |
| Catalyst concentration | 1009.902                | 3               | 336.634     | 16.255   | .023 |
| Reaction temperature   | 1092.762                | 3               | 364.254     | 17.589   | .021 |
| Reaction time          | 2070.207                | 3               | 690.069     | 33.322   | .008 |
| Error                  | 62.127                  | 3               | 20.709      |          |      |
| Total                  | 92132.650               | 16              |             |          |      |
| Corrected total        | 4738.509                | 15              |             |          |      |

a.  $R^2 = .987$  (Adjusted  $R^2 = .934$ )
